# Supplementary material for: Blue-light-excited narrowing red photoluminescence in lead-free double perovskite Cs2−xKxAg0.6Na0.4In0.8Bi0.2Cl6−xBrx with cryogenic effects
Source: Royal Society of Chemistry journal article supplement (doi:10.1039/d1qi00928a), 2021-09-20
Supplement: d1qi00928a1.pdf [file d1qi00928a1.pdf]

Electronic Supplementary Material (ESI) for Inorganic Chemistry Frontiers.

## Supporting information

for

Blue-Light-Excited Narrowing Red Photoluminescence in Lead-Free Double Perovskite  $\text{Cs}_{2-x}\text{K}_x\text{Ag}_{0.6}\text{Na}_{0.4}\text{In}_{0.8}\text{Bi}_{0.2}\text{Cl}_{6-x}\text{Br}_x$  with Cryogenic Effect

*Xiao-Kai Gong, Xiao-Song Zhang\*, Ru-Kun Ding, Hao Yin, Zhao-Wei Zhang, Lan Li,*

*Jian-Ping Xu, Qian Li, Long Liu, Yue-Ming Zhang, Chao Li, Liu Pei*

Key Laboratory of Display Materials and Photoelectric Devices, Ministry of Education, Tianjin Key Laboratory for Photoelectric Materials and Devices and School of Materials Science and Engineering, Institute of Material Physics, Tianjin University of Technology, Tianjin 300384, China

\*Corresponding author E-mail: [zhangxiaosong022@126.com](mailto:zhangxiaosong022@126.com) (Xiao-Song Zhang\*)

**Table S1.** The ICP results of  $\text{Cs}_{2-x}\text{K}_x\text{Ag}_{0.6}\text{Na}_{0.4}\text{In}_{0.8}\text{Bi}_{0.2}\text{Cl}_{6-x}\text{Br}_x$ .

To make our ICP-MS results more reliable, blank and standard samples were first used to calibrate the equipment. Then, we measured K and Cs content in  $\text{Cs}_{2-x}\text{K}_x\text{Ag}_{0.6}\text{Na}_{0.4}\text{In}_{0.8}\text{Bi}_{0.2}\text{Cl}_{6-x}\text{Br}_x$  solution dissolved by  $\text{HNO}_3$ . This data was used to compute the K/Cs ratio of  $\text{Cs}_{2-x}\text{K}_x\text{Ag}_{0.6}\text{Na}_{0.4}\text{In}_{0.8}\text{Bi}_{0.2}\text{Cl}_{6-x}\text{Br}_x$ .

| $\text{Cs}_{2-x}\text{K}_x\text{Ag}_{0.6}\text{Na}_{0.4}\text{In}_{0.8}\text{Bi}_{0.2}\text{Cl}_{6-x}\text{Br}_x$ | K (ug/L) | Cs (ug/L) | K %   | Cs %  |
|-------------------------------------------------------------------------------------------------------------------|----------|-----------|-------|-------|
| 1:0                                                                                                               | 0        | 167.478   | 0     | 100   |
| 1:0.1                                                                                                             | 29.649   | 310.236   | 24.52 | 75.48 |
| 1:0.4                                                                                                             | 32.171   | 137.211   | 44.35 | 55.65 |
| 1:0.6                                                                                                             | 32.331   | 101.524   | 51.98 | 48.02 |
| 1:1                                                                                                               | 70.152   | 182.230   | 56.68 | 43.32 |
| 1:1.2                                                                                                             | 44.776   | 164.838   | 48.01 | 51.99 |

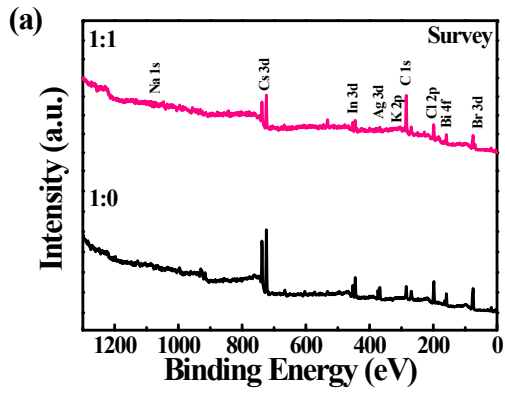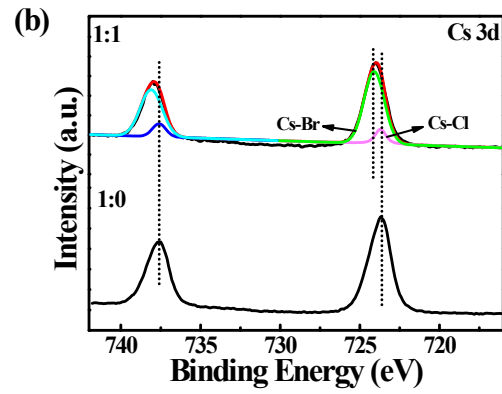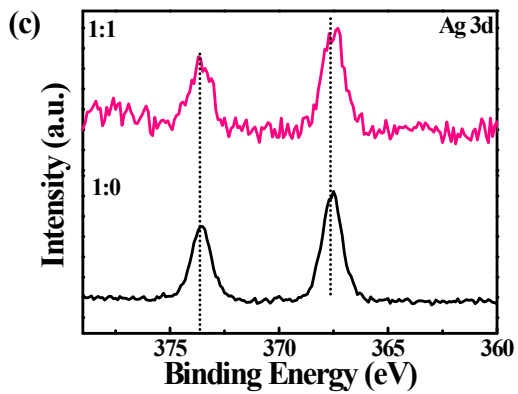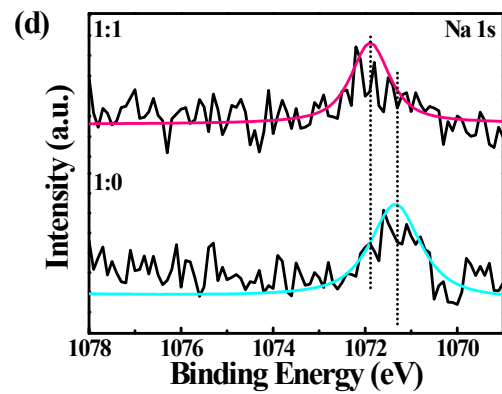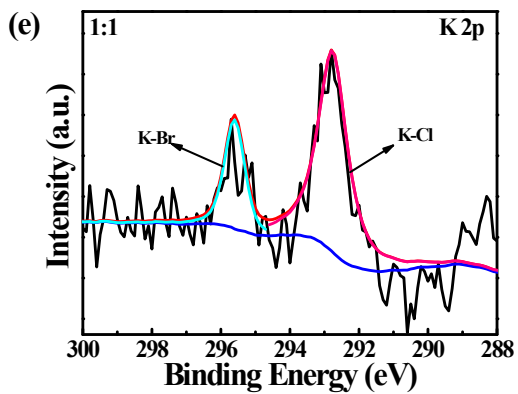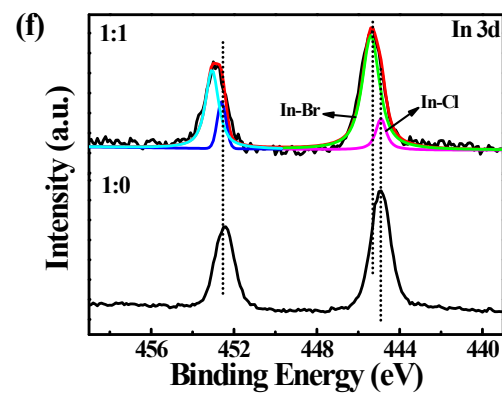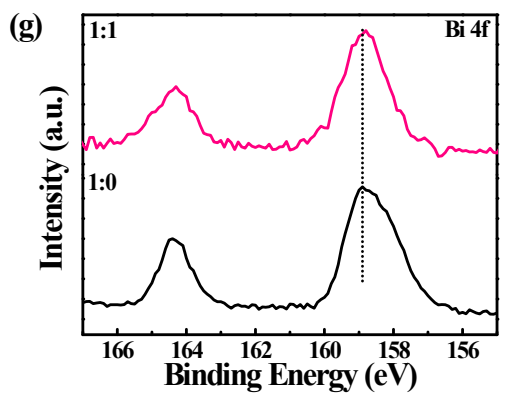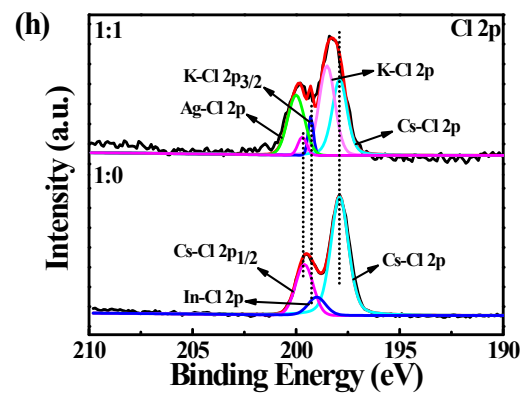

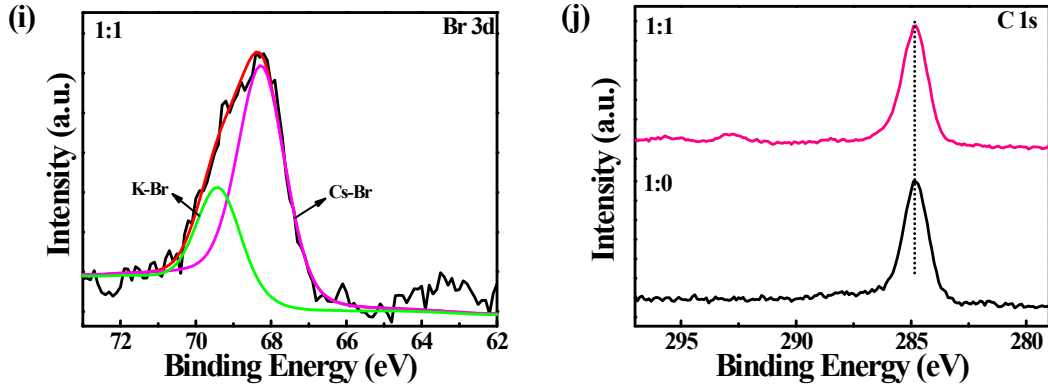

**Figure S1.** (a) Survey-scan XPS spectra of  $\text{Cs}_2\text{Ag}_{0.6}\text{Na}_{0.4}\text{In}_{0.8}\text{Bi}_{0.2}\text{Cl}_6$  (1:0) and  $\text{Cs}_{2-x}\text{K}_x\text{Ag}_{0.6}\text{Na}_{0.4}\text{In}_{0.8}\text{Bi}_{0.2}\text{Cl}_{6-x}\text{Br}_x$  (1:1). High resolution XPS spectra of: (b) Cs 3d, (c) Ag 3d, (d) Na 1s, (e) K 2p, (f) In 3d, (g) Bi 4f, (h) Cl 2p, (i) Br 3d and (j) C 1s.

**Table S2.** Fitting values of  $\tau_1$ ,  $A_1$ ,  $\tau_2$ ,  $A_2$  and  $\tau_{av}$  at 10 K.

| $\text{Cs}_{2-x}\text{K}_x\text{Ag}_{0.6}\text{Na}_{0.4}\text{In}_{0.8}\text{Bi}_{0.2}\text{Cl}_{6-x}\text{Br}_x$ (1:1) | $\tau_1$ (us) |               |       |                  |       |
|-------------------------------------------------------------------------------------------------------------------------|---------------|---------------|-------|------------------|-------|
|                                                                                                                         | $A_1$         | $\tau_2$ (us) | $A_2$ | $\tau_{av}$ (us) |       |
| $\lambda_{ex} = 365$ nm                                                                                                 | 15.30         | 98            | 46.90 | 2                | 15.97 |
| $\lambda_{ex} = 467$ nm                                                                                                 | 25.33         | 76            | 72.84 | 24               | 36.69 |

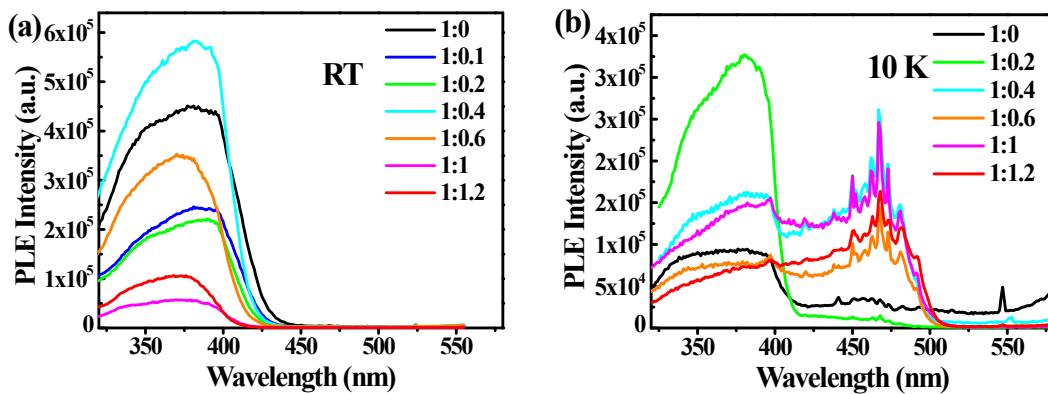

**Figure S2.** PLE spectra of  $\text{Cs}_{2-x}\text{K}_x\text{Ag}_{0.6}\text{Na}_{0.4}\text{In}_{0.8}\text{Bi}_{0.2}\text{Cl}_{6-x}\text{Br}_x$  at (a) 10 K and (b) room temperature.

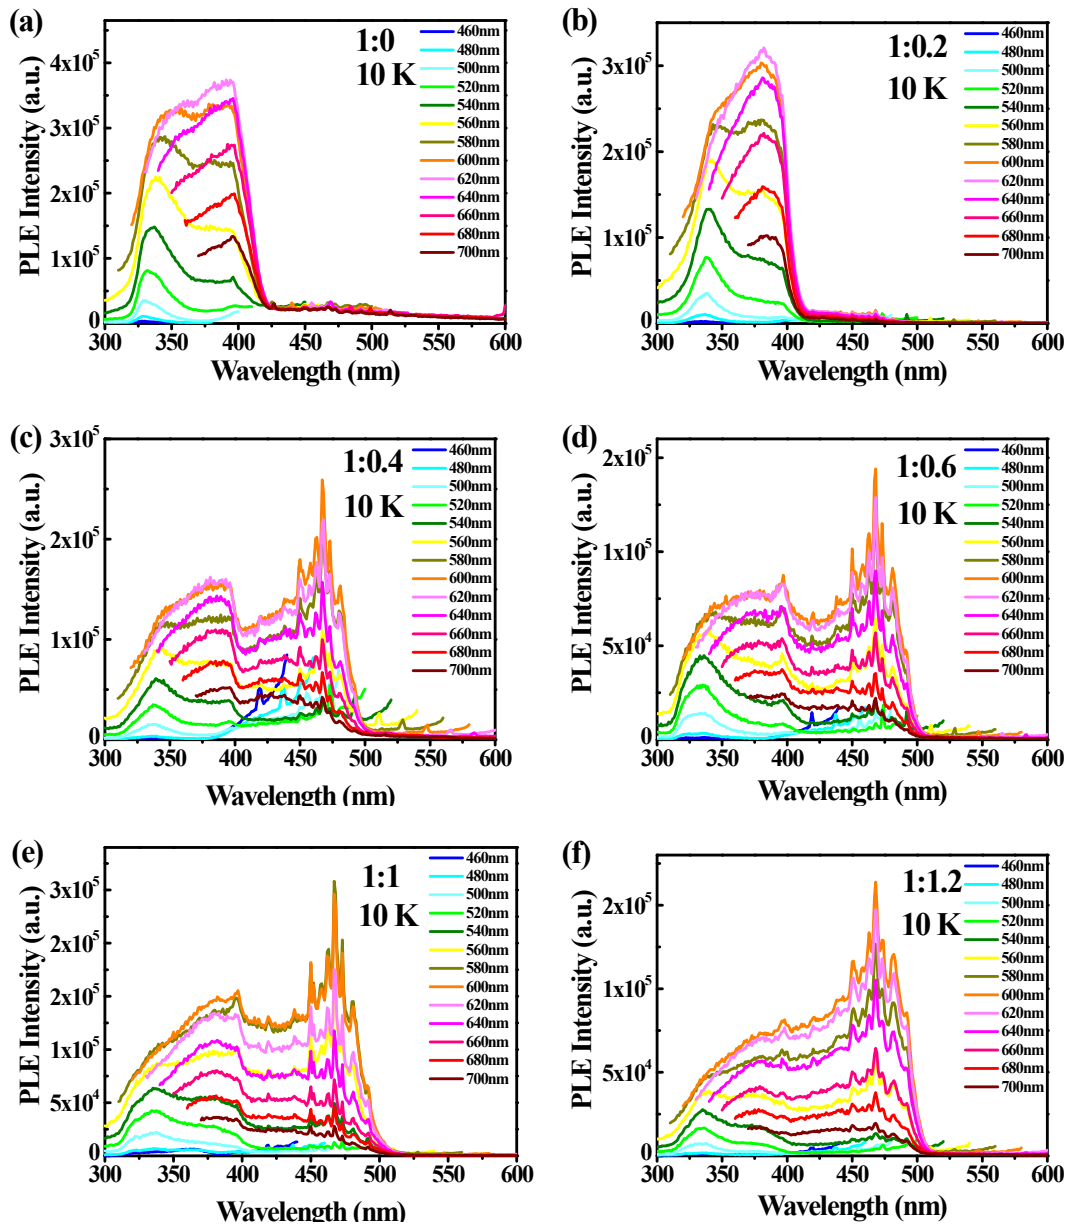

**Figure S3.** PLE spectra of (a) 1:0.0, (b) 1:0.2, (c) 1:0.4, (d) 1:0.6, (e) 1:1.0 and (f) :1.2 at 10 K.

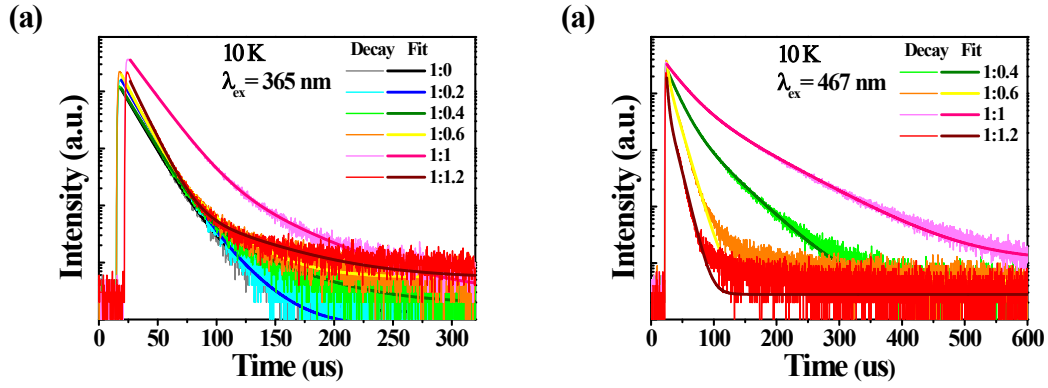

**Figure S4.** Time-resolved PL spectra of  $\text{Cs}_{2-x}\text{K}_x\text{Ag}_{0.6}\text{Na}_{0.4}\text{In}_{0.8}\text{Bi}_{0.2}\text{Cl}_{6-x}\text{Br}_x$  excited at (a) 365 nm and (b) 467 nm at 10 K.

**Table S3.** Fitting values of  $\tau_1$ ,  $A_1$ ,  $\tau_2$ ,  $A_2$  and  $\tau_{av}$  at 10 K.

| 10 K ( $\lambda_{ex}=365$ nm) | $\tau_1$ (us) | $A_1$ | $\tau_2$ (us) | $A_2$ | $\tau_{av}$ (us) |
|-------------------------------|---------------|-------|---------------|-------|------------------|
| 1:0                           | 12.16         | 98    | 28.60         | 2     | 12.53            |
| 1:0.2                         | 11.97         | 97    | 23.95         | 3     | 12.36            |
| 1:0.4                         | 12.62         | 99    | 44.96         | 1     | 13.05            |
| 1:0.6                         | 10.74         | 97    | 29.71         | 3     | 11.40            |
| 1:1                           | 15.30         | 98    | 46.90         | 2     | 15.97            |
| 1:1.2                         | 10.18         | 99    | 54.04         | 1     | 10.61            |

**Table S4.** Fitting values of  $\tau_1$ ,  $A_1$ ,  $\tau_2$ ,  $A_2$  and  $\tau_{av}$  at 10 K.

| 10 K ( $\lambda_{ex}=467$ nm) | $\tau_1$ (us) | $A_1$ | $\tau_2$ (us) | $A_2$ | $\tau_{av}$ (us) |
|-------------------------------|---------------|-------|---------------|-------|------------------|
| 1:0.4                         | 15.35         | 85    | 42.69         | 15    | 19.51            |
| 1:0.6                         | 11.54         | 51    | 3.20          | 49    | 7.43             |
| 1:1                           | 25.33         | 76    | 72.84         | 24    | 36.69            |
| 1:1.2                         | 2.24          | 71    | 9.53          | 29    | 4.36             |

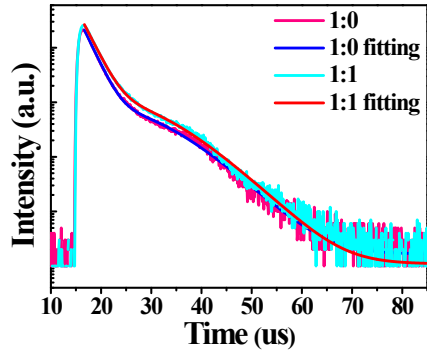

**Figure S5.** Time-resolved PL spectra of  $\text{Cs}_2\text{Ag}_{0.6}\text{Na}_{0.4}\text{In}_{0.8}\text{Bi}_{0.2}\text{Cl}_6$  (1:0) and  $\text{Cs}_{2-x}\text{K}_x\text{Ag}_{0.6}\text{Na}_{0.4}\text{In}_{0.8}\text{Bi}_{0.2}\text{Cl}_{6-x}\text{Br}_x$  (1:1) excited at 365 nm at room temperature.

**Table S5.** Fitting values of  $\tau_1$ ,  $A_1$ ,  $\tau_2$ ,  $A_2$ ,  $\tau_3$ ,  $A_3$  and  $\tau_{av}$  at room temperature (RT).

| RT ( $\lambda_{\text{ex}}=365$ nm) | $\tau_1$ (us) | $A_1$ % | $\tau_2$ (us) | $A_2$ % | $\tau_3$ (us) | $A_3$ % | $\tau_{av}$ (us) |
|------------------------------------|---------------|---------|---------------|---------|---------------|---------|------------------|
| 1:0                                | 5.25          | 40      | 5.51          | 40      | 1.89          | 20      | 4.69             |
| 1:1                                | 4.22          | 29      | 3.96          | 49      | 3.53          | 21      | 3.94             |

**Table S6.** Fitting parameters of  $I(0)$ ,  $A$  and  $\Delta E$  at 365 nm excitation.

| $\text{Cs}_{2-x}\text{K}_x\text{Ag}_{0.6}\text{Na}_{0.4}\text{In}_{0.8}\text{Bi}_{0.2}\text{Cl}_{6-x}\text{Br}_x$<br>(180-300k) | $I(0)$    | $\Delta E / \text{meV}$ | $A$    |
|---------------------------------------------------------------------------------------------------------------------------------|-----------|-------------------------|--------|
| 1:0 ( $\lambda_{\text{ex}} = 365 \text{ nm}$ )                                                                                  | 85891.3   | 178.68                  | 851.95 |
| 1:0.2 ( $\lambda_{\text{ex}} = 365 \text{ nm}$ )                                                                                | 95276.66  | 153.33                  | 223.69 |
| 1:0.4 ( $\lambda_{\text{ex}} = 365 \text{ nm}$ )                                                                                | 100691.68 | 148.78                  | 301.76 |
| 1:0.6 ( $\lambda_{\text{ex}} = 365 \text{ nm}$ )                                                                                | 62715.98  | 132.04                  | 123.20 |
| 1:1.0 ( $\lambda_{\text{ex}} = 365 \text{ nm}$ )                                                                                | 103966.91 | 129.84                  | 202.06 |
| 1:1.2 ( $\lambda_{\text{ex}} = 365 \text{ nm}$ )                                                                                | 53882.29  | 118.77                  | 31.63  |

**Table S7.** Fitting parameters of  $I(0)$ ,  $A$  and  $\Delta E$  at 467 nm excitation.

| $\text{Cs}_{2-x}\text{K}_x\text{Ag}_{0.6}\text{Na}_{0.4}\text{In}_{0.8}\text{Bi}_{0.2}\text{Cl}_{6-x}\text{Br}_x$ (10-<br>180k) | $I(0)$   | $\Delta E / \text{meV}$ | $A$    |
|---------------------------------------------------------------------------------------------------------------------------------|----------|-------------------------|--------|
| 1:0.4 ( $\lambda_{\text{ex}} = 467 \text{ nm}$ )                                                                                | 234762.4 | 42.55                   | 75.18  |
| 1:0.6 ( $\lambda_{\text{ex}} = 467 \text{ nm}$ )                                                                                | 126282.3 | 43.85                   | 206.58 |
| 1:1.0 ( $\lambda_{\text{ex}} = 467 \text{ nm}$ )                                                                                | 65312.81 | 53.74                   | 372.22 |
| 1:1.2 ( $\lambda_{\text{ex}} = 467 \text{ nm}$ )                                                                                | 141479.6 | 44.93                   | 388.31 |



**Table S8.** Fitting parameters of  $E_g(0)$ ,  $S$  and  $\langle \eta\omega \rangle$  at 467 nm excitation.

| $\text{Cs}_{2-x}\text{K}_x\text{Ag}_{0.6}\text{Na}_{0.4}\text{In}_{0.8}\text{Bi}_{0.2}\text{Cl}_{6-x}\text{Br}_x$ (180-300k) | $E_g(0)/eV$ | $S$  | $\langle \eta\omega \rangle / meV$ |
|------------------------------------------------------------------------------------------------------------------------------|-------------|------|------------------------------------|
| 1:0 ( $\lambda_{\text{ex}} = 365$ nm)                                                                                        | 2.03        | 4.31 | 28.08                              |
| 1:0.2 ( $\lambda_{\text{ex}} = 365$ nm)                                                                                      | 2.03        | 3.77 | 22.36                              |
| 1:0.4 ( $\lambda_{\text{ex}} = 365$ nm)                                                                                      | 2.03        | 3.83 | 29.23                              |
| 1:0.6 ( $\lambda_{\text{ex}} = 365$ nm)                                                                                      | 2.03        | 4.38 | 22.04                              |
| 1:1 ( $\lambda_{\text{ex}} = 365$ nm)                                                                                        | 2.03        | 4.47 | 30.80                              |
| 1:1.2 ( $\lambda_{\text{ex}} = 365$ nm)                                                                                      | 2.04        | 3.41 | 16.18                              |

**Table S9.** Fitting parameters of  $E_g(0)$ ,  $S$  and  $\langle h\omega \rangle$  at 467 nm excitation.

| $\text{Cs}_{2-x}\text{K}_x\text{Ag}_{0.6}\text{Na}_{0.4}\text{In}_{0.8}\text{Bi}_{0.2}\text{Cl}_{6-x}\text{Br}_x$ (10-150k) | $E_g(0)/eV$ | $S$  | $\langle h\omega \rangle / meV$ |
|-----------------------------------------------------------------------------------------------------------------------------|-------------|------|---------------------------------|
| 1:0.4 ( $\lambda_{\text{ex}} = 467$ nm)                                                                                     | 2.05        | 0.50 | 5.30                            |
| 1:0.6 ( $\lambda_{\text{ex}} = 467$ nm)                                                                                     | 2.06        | 0.75 | 25.12                           |
| 1:1.0 ( $\lambda_{\text{ex}} = 467$ nm)                                                                                     | 2.04        | 0.94 | 1.96                            |
| 1:1.2 ( $\lambda_{\text{ex}} = 467$ nm)                                                                                     | 2.05        | 1.20 | 93.49                           |

**Table S10.** Fitting parameters of  $\Gamma_0$ ,  $\Gamma_{op}$  and  $\eta\omega_{op}$  at 365 nm excitation wavelength.

| $\text{Cs}_{2-x}\text{K}_x\text{Ag}_{0.6}\text{Na}_{0.4}\text{In}_{0.8}\text{Bi}_{0.2}\text{Cl}_{6-x}\text{Br}_x$ (10-180k) | $\Gamma_0/\text{meV}$ | $\Gamma_{op}/\text{meV}$ | $\eta\omega_{op}/\text{meV}$ |
|-----------------------------------------------------------------------------------------------------------------------------|-----------------------|--------------------------|------------------------------|
| 1:0 ( $\lambda_{\text{ex}}=365$ nm)                                                                                         | 399.93                | 138.28                   | 13.10                        |
| 1:0.2 ( $\lambda_{\text{ex}}=365$ nm)                                                                                       | 393.97                | 89.70                    | 8.83                         |
| 1:0.4 ( $\lambda_{\text{ex}}=365$ nm)                                                                                       | 387.17                | 215.57                   | 16.01                        |
| 1:0.6 ( $\lambda_{\text{ex}}=365$ nm)                                                                                       | 378.16                | 688.30                   | 22.70                        |
| 1:1 ( $\lambda_{\text{ex}}=365$ nm)                                                                                         | 377.57                | 132.56                   | 11.16                        |
| 1:1.2 ( $\lambda_{\text{ex}}=365$ nm)                                                                                       | 362.18                | 49.44                    | 4.51                         |

**Table S11.** Fitting parameters of  $\Gamma_0$ ,  $\Gamma_{op}$  and  $\eta\omega_{op}$  at 467 nm excitation wavelength.

| $\text{Cs}_{2-x}\text{K}_x\text{Ag}_{0.6}\text{Na}_{0.4}\text{In}_{0.8}\text{Bi}_{0.2}\text{Cl}_{6-x}\text{Br}_x$ (10-150k) | $\Gamma_0/\text{meV}$ | $\Gamma_{op}/\text{meV}$ | $\eta\omega_{op}/\text{meV}$ |
|-----------------------------------------------------------------------------------------------------------------------------|-----------------------|--------------------------|------------------------------|
| 1:0.4 ( $\lambda_{\text{ex}}=467$ nm)                                                                                       | 301.61                | 2828.32                  | 40.00                        |
| 1:0.6 ( $\lambda_{\text{ex}}=467$ nm)                                                                                       | 316.67                | 4378.67                  | 41.71                        |
| 1:1 ( $\lambda_{\text{ex}}=467$ nm)                                                                                         | 280.06                | 5353.20                  | 46.49                        |
| 1:1.2 ( $\lambda_{\text{ex}}=467$ nm)                                                                                       | 302.59                | 1705.16                  | 35.43                        |
